# Supplementary material for: Development of a 3D atlas of the embryonic pancreas for topological and quantitative analysis of heterologous cell interactions
Source: Development. 2022 Feb 4;149(3):dev199655. doi: 10.1242/dev.199655 (PMC8918780; doi:10.1242/dev.199655)
Supplement: Supplementary information [file develop-149-199655-s1.pdf]

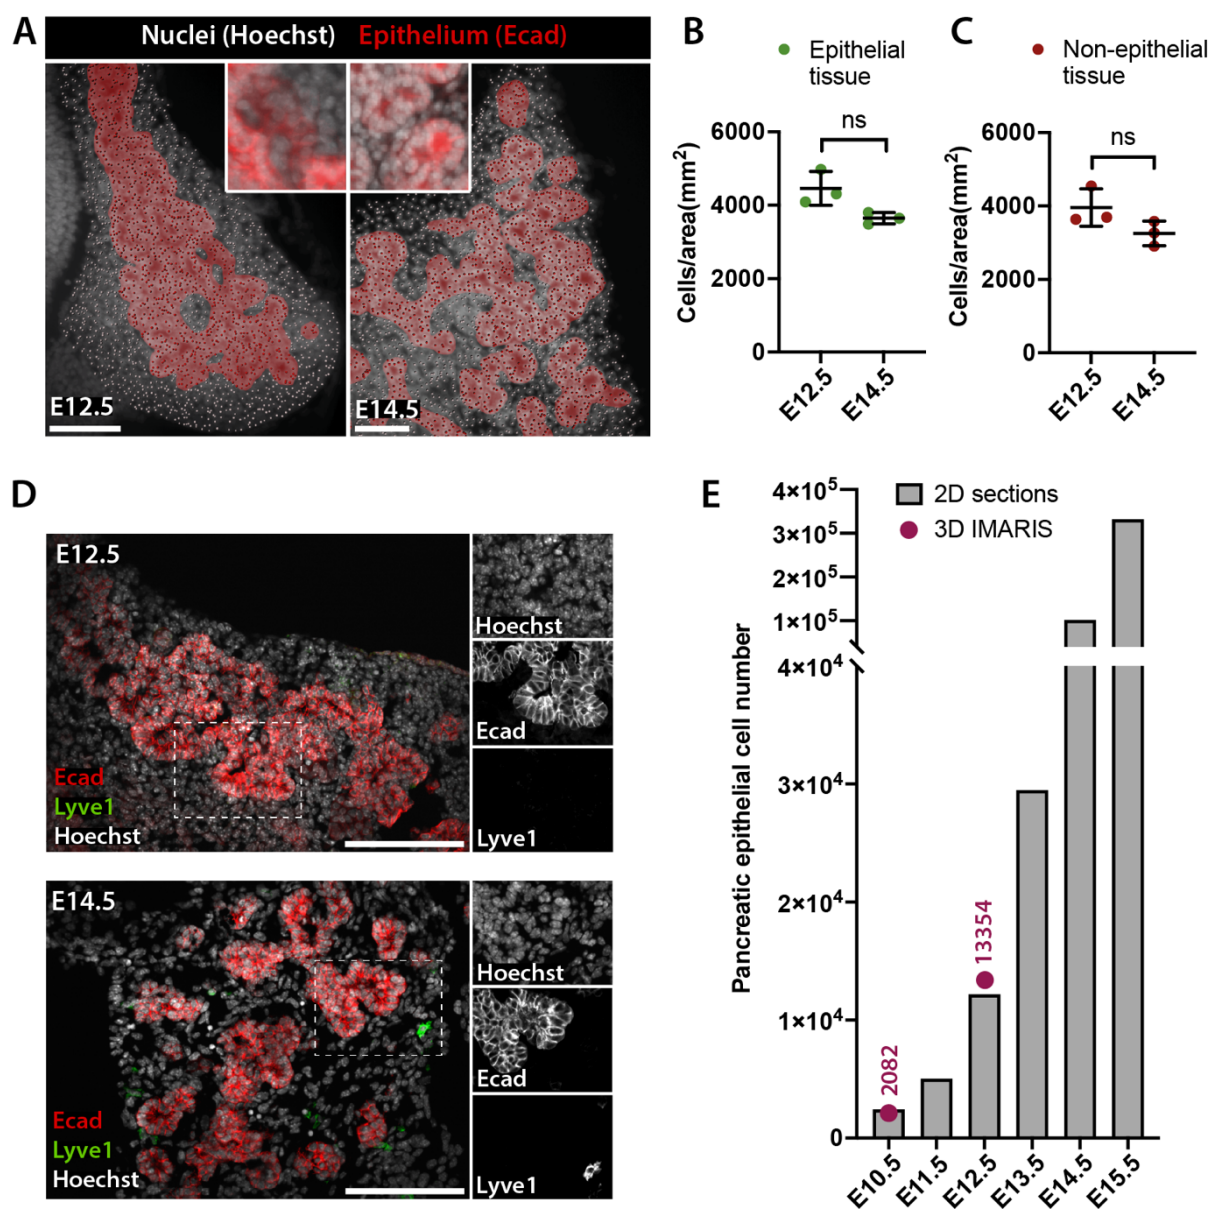

**Fig. S1. Analysis of LSFM scans of embryonic pancreas.**

**(A)** Cell density in pancreatic epithelium (Ecad<sup>+</sup>) and non-epithelial tissues was measured on optical sections from LSM scans of E12.5 and E14.5 embryonic pancreata using the Imaris software. Tissues were stained with antibodies against Ecad to distinguish the pancreatic epithelium and Hoechst as nuclear counterstain. Scale bar, 50  $\mu$ m. **(B, C)** Scatter plot showing quantification of cells per area in epithelial (B) and non-epithelial tissues (C) at E12.5 (n=3) and E14.5 (n=3). Epithelial and non-epithelial areas were measured using the manual ‘Surface creation’ module and nuclei were detected using the ‘Spots creation’ module. For each embryo,

optical sections were analysed at regular intervals (E12.5, every 30µm: E14.5, every 60µm) throughout the entire pancreatic tissue to calculate the average cell density. Overall cell density in epithelial and non-epithelial pancreatic tissues was unchanged between E12.5 and E14.5 pancreata.

**(D)** Representative IF images of pancreatic tissue sections at E12.5 (A) and E14.5 (B). IF labelling for the Lymphatic vessel endothelial hyaluronan receptor 1 (Lyve1; green) marks rare lymphatic cells in the embryonic pancreas. Ecad (red) demarcates the pancreatic epithelium. Hoechst (grey) was used as nuclear counterstain. Insets show higher magnifications of the boxed regions as single channel configuration. Scale bars, 100 µm. **(E)** Measurement of epithelial cell number in the dorsal pancreas from E10.5 to E15.5 using Halo software and Imaris software. Total epithelial cell number was determined with HALO software by integrating the number of epithelial cells (Ecad<sup>+</sup>) computed on regularly spaced 2D sections (every 30 µm) spanning the whole pancreatic anlagen (Gonay et al., 2021). 3D Imaris quantification (red) was performed using ‘Spots’ segmentation on epithelial cells (Ecad<sup>+</sup> or Pdx1<sup>+</sup>) of the entire pancreatic tissue at stage E10.5 and E12.5.

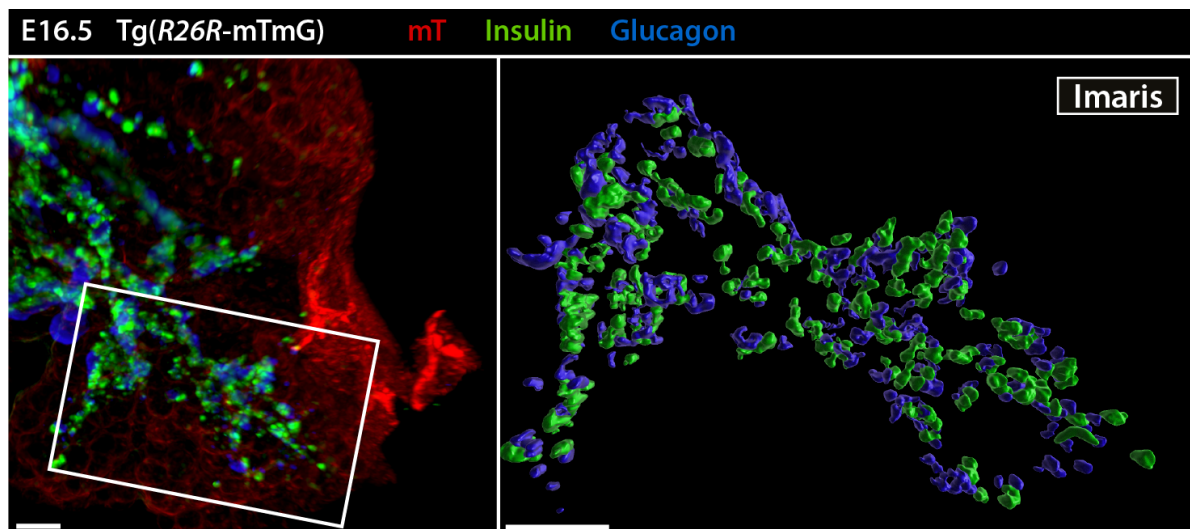

**Fig. S2. LSFM images of pancreas endocrine tissue.** Representative LSFM 3D image (left) and Imaris surface rendering (right) of the pancreas from *Tg(R26R-mTmG)* embryos at E16.5. WMIF for insulin (green) and glucagon (blue) labels the pancreatic beta- and alpha- endocrine cells, respectively. mT (red) mark all cell membranes. Right panel, surface rendered 3D model of the boxed area showing insulin<sup>+</sup> and glucagon<sup>+</sup> cells adjacent to each other, arranged in a peninsular structure with peripheral glucagon<sup>+</sup> cells and internal insulin<sup>+</sup> cells. Scale bars, 100  $\mu$ m.

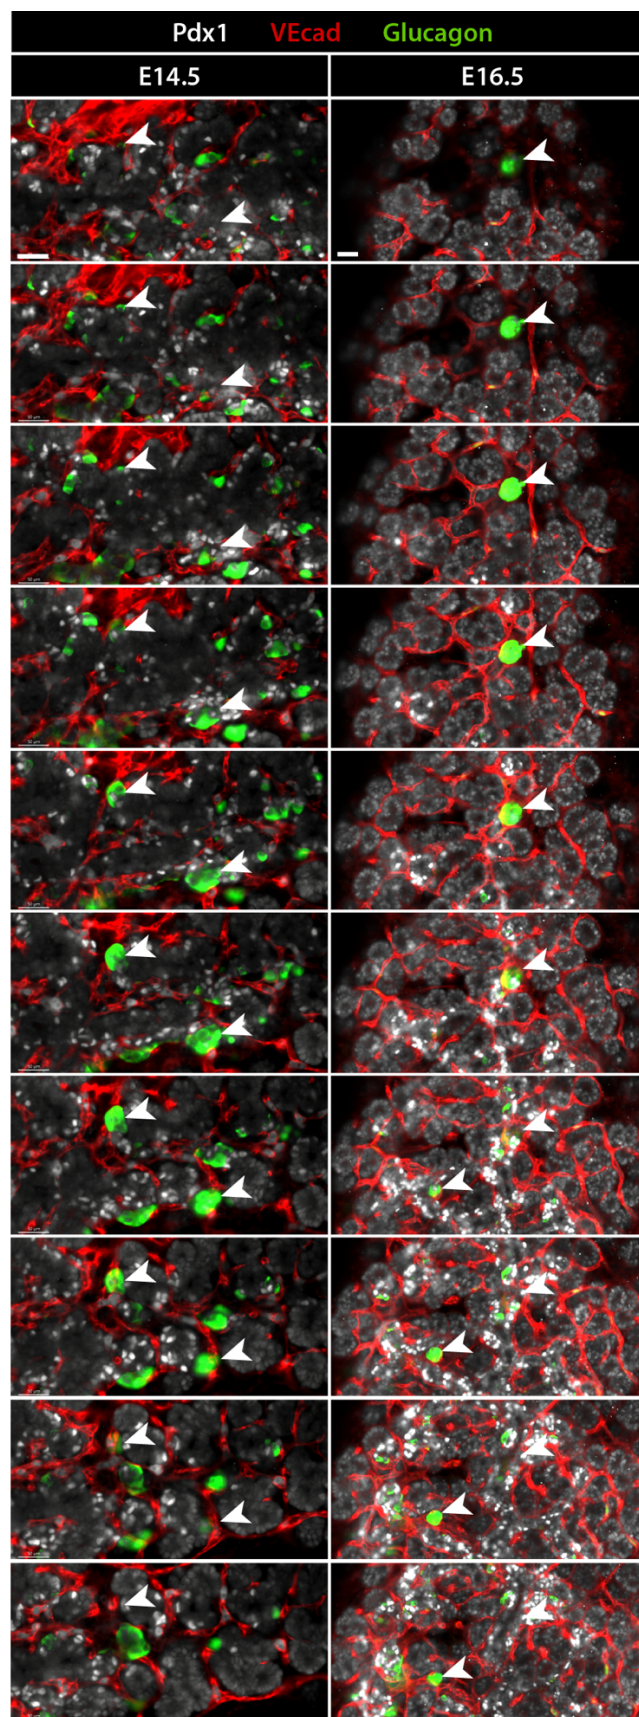

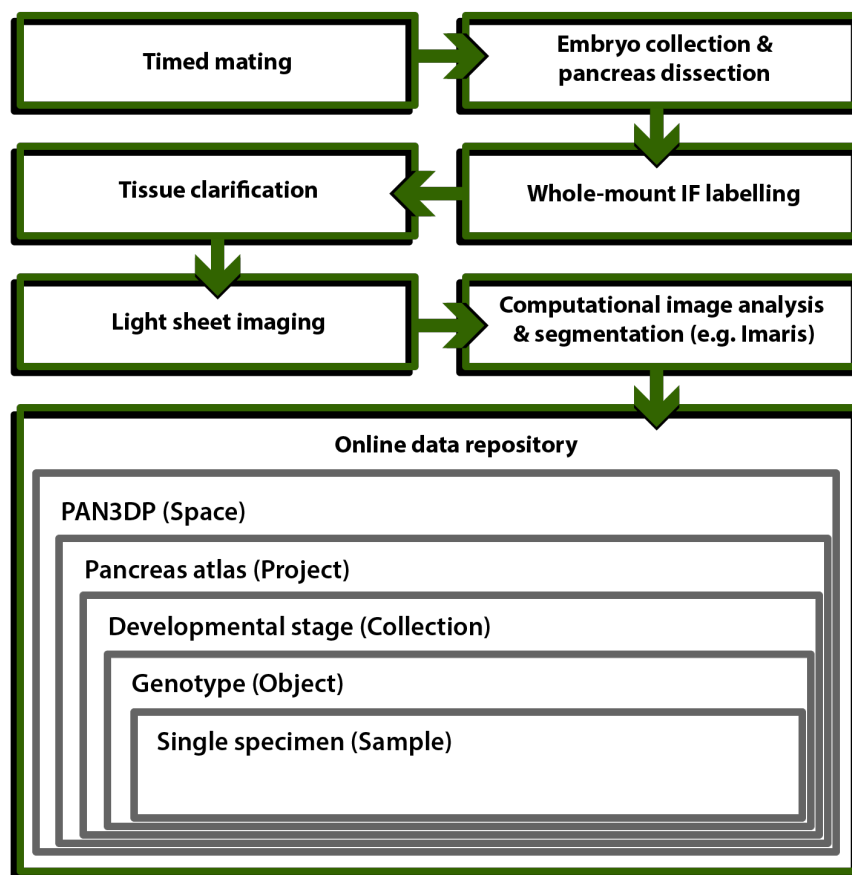

**Fig. S4. Schematic representation of data collection and deposition.** Flowchart describing the experimental steps used to generate the image dataset presented here and the organizational structure of the online data repository in which they can be accessed.

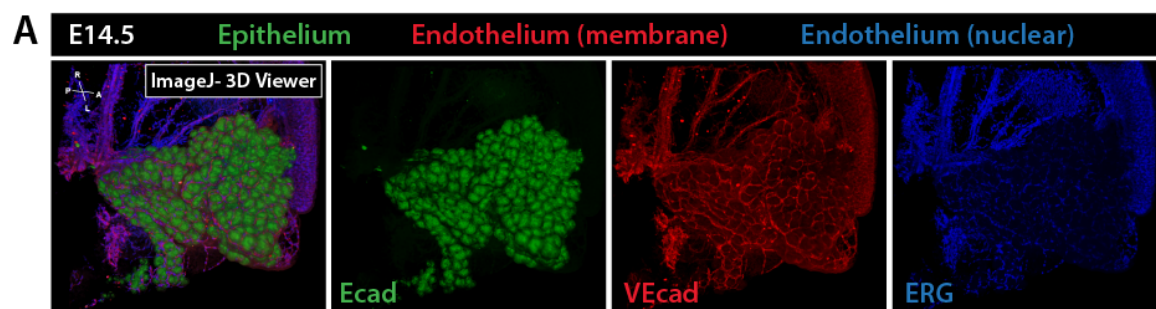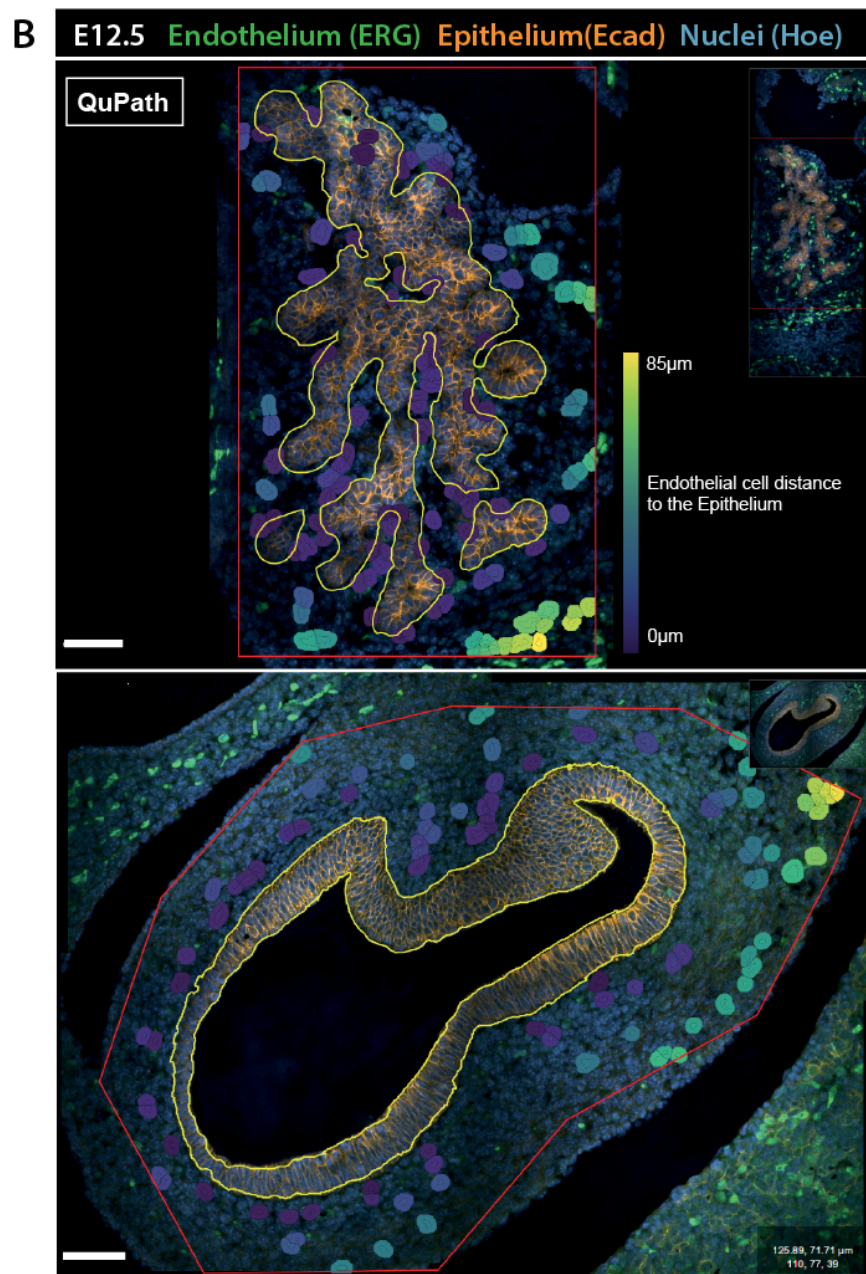

**Fig. S5. Visualisation and analysis of LSFM 3D images of pancreatic tissue using open- source software. (A)** Representative LSFM 3D images of the E14.5 wildtype pancreas shown in Fig. 3B visualized using the 3D Viewer plugin in ImageJ. WMIF for Ecad (green), VEcad (red) and ERG (blue). 3D images and surface renderings are shown as merged (leftmost panel) and individual channels (right panels). A, anterior; P, posterior; L, left; R, right. **(B)** Quantitative analysis of endothelial cell distribution around the pancreatic epithelium using QuPath. QuPath rendering of the E12.5 pancreas and stomach sections shown in Fig. 4G. E- cadherin (Ecad) labelling is shown in orange, ERG in green and Hoechst in blue. ERG positive endothelial cells are pseudocolored using the "Distance to annotation" tool. Endothelial cells pseudocolour follow the Viridis palette according to their distance from the epithelium (Ecad<sup>+</sup> region).

Table S1. Data deposited in the Pancreas Embryonic Cell Atlas.

| Stage | All nuclei |         | Epithelial cells |               |            | Endothelial cells |     |       |               | Mesenchymal cells |                | Endocrine Cells |               |         |      | No of images |
|-------|------------|---------|------------------|---------------|------------|-------------------|-----|-------|---------------|-------------------|----------------|-----------------|---------------|---------|------|--------------|
|       | DRAQ5      | HOECHST | Pdx1             | Pdx1-Cre mTmG | E-Cadherin | VE-Cadherin       | ERG | Sox17 | Cdh5-Cre mTmG | Nkx2.5-Cre mTmG   | Nkx2.5-Cre H2B | Glucagon        | Ins2-Cre mTmG | Insulin | Pax6 |              |
| E12.5 |            |         |                  |               |            |                   |     |       |               |                   |                |                 |               |         |      | 3            |
| E12.5 |            |         |                  |               |            |                   |     |       |               |                   |                |                 |               |         |      | 7            |
| E12.5 |            |         |                  |               |            |                   |     |       |               |                   |                |                 |               |         |      | 1            |
| E12.5 |            |         |                  |               |            |                   |     |       |               |                   |                |                 |               |         |      | 4            |
| E12.5 |            |         |                  |               |            |                   |     |       |               |                   |                |                 |               |         |      | 1            |
| E12.5 |            |         |                  |               |            |                   |     |       |               |                   |                |                 |               |         |      | 3            |
| E12.5 |            |         |                  |               |            |                   |     |       |               |                   |                |                 |               |         |      | 6            |
| E12.5 |            |         |                  |               |            |                   |     |       |               |                   |                |                 |               |         |      | 2            |
| E12.5 |            |         |                  |               |            |                   |     |       |               |                   |                |                 |               |         |      | 1            |
| E12.5 |            |         |                  |               |            |                   |     |       |               |                   |                |                 |               |         |      | 4            |
| E12.5 |            |         |                  |               |            |                   |     |       |               |                   |                |                 |               |         |      | 3            |
| E14.5 |            |         |                  |               |            |                   |     |       |               |                   |                |                 |               |         |      | 4            |
| E14.5 |            |         |                  |               |            |                   |     |       |               |                   |                |                 |               |         |      | 4            |
| E14.5 |            |         |                  |               |            |                   |     |       |               |                   |                |                 |               |         |      | 5            |
| E14.5 |            |         |                  |               |            |                   |     |       |               |                   |                |                 |               |         |      | 3            |
| E14.5 |            |         |                  |               |            |                   |     |       |               |                   |                |                 |               |         |      | 2            |
| E14.5 |            |         |                  |               |            |                   |     |       |               |                   |                |                 |               |         |      | 1            |
| E14.5 |            |         |                  |               |            |                   |     |       |               |                   |                |                 |               |         |      | 3            |
| E16.5 |            |         |                  |               |            |                   |     |       |               |                   |                |                 |               |         |      | 2            |
| E16.5 |            |         |                  |               |            |                   |     |       |               |                   |                |                 |               |         |      | 2            |
| E16.5 |            |         |                  |               |            |                   |     |       |               |                   |                |                 |               |         |      | 1            |
| E16.5 |            |         |                  |               |            |                   |     |       |               |                   |                |                 |               |         |      | 1            |
| E16.5 |            |         |                  |               |            |                   |     |       |               |                   |                |                 |               |         |      | 1            |
| E18.5 |            |         |                  |               |            |                   |     |       |               |                   |                |                 |               |         |      | 1            |
| P0    |            |         |                  |               |            |                   |     |       |               |                   |                |                 |               |         |      | 1            |

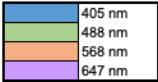

**Table S2. Antibodies and fluorescent dyes**

| Name                                                | Company           | Catalog Number | Dilution |
|-----------------------------------------------------|-------------------|----------------|----------|
| Rat anti-E-CADHERIN                                 | Sigma             | U3254          | 1:500    |
| Rabbit anti-ERG                                     | Abcam             | Ab92513        | 1:100    |
| Chicken anti-GFP                                    | Aves              | GFP-1020       | 1:400    |
| Rabbit anti-Glucagon                                | Immunostar Inc.   | 20076          | 1:500    |
| Guinea pig anti-Insulin                             | Agilent/Dako      | A0564          | 1:300    |
| Guinea pig anti-PDX1                                | Abcam             | Ab47308        | 1:500    |
| Rat anti-RFP                                        | Antikörper online | ABIN334653     | 1:400    |
| Goat anti-SOX17                                     | R&D Systems       | AF1924         | 1:200    |
| Goat anti-VE-CADHERIN                               | R&D Systems       | AF1002-SP      | 1:50     |
| Donkey Alexa Fluor 488-labelled Anti-Goat IgG       | Invitrogen        | A11055         | 1:1000   |
| Donkey Alexa Fluor 488-labelled Anti-Guinea Pig IgG | Dianova           | 706-545-148    | 1:1000   |
| Donkey Alexa Fluor 488-labelled Anti-Rat IgG        | Invitrogen        | A21208         | 1:1000   |
| Goat Alexa Fluor 488-labelled Anti-Chicken IgG      | Invitrogen        | A11039         | 1:1000   |
| Donkey Alexa Fluor 568-labelled Anti-Goat IgG       | Invitrogen        | A11057         | 1:1000   |
| Donkey Alexa Fluor 594-labelled Anti-Rat IgG        | Invitrogen        | A21209         | 1:1000   |
| Goat Alexa Fluor 568-labelled Anti-Guinea Pig IgG   | Invitrogen        | A11075         | 1:1000   |
| Donkey Alexa Fluor 647-labelled Anti-Guinea Pig IgG | Dianova           | 706-605-148    | 1:1000   |
| Donkey Alexa Fluor 647-labelled Anti-Rabbit IgG     | Invitrogen        | A31573         | 1:1000   |
| Donkey Alexa Fluor 647-labelled Anti-Rat IgG        | Dianova           | 712-605-153    | 1:1000   |
| eBioscience™ DRAQ5™                                 | Invitrogen        | 65-0880-96     | 1:500    |
| Hoechst 33342                                       | Invitrogen        | H1399          | 1:1000   |
